# Supplementary material for: Phenotypic Expression of CFH Rare Variants in Age-Related Macular Degeneration Patients in the Coimbra Eye Study
Source: PubMed Central journal article supplement — Invest Ophthalmol Vis Sci. 2022 Aug 4;63(9):5. doi: 10.1167/iovs.63.9.5 (PMC9363674; doi:10.1167/iovs.63.9.5), 2022-08-04
Supplement: iovs-63-9-5_s001.pdf [file iovs-63-9-5_s001.pdf]

**Supplementary Table 1.** Allele frequencies (AFs) of major risk variants in AMD in the CES and comparison to the EYE-RISK<sup>9</sup> and the IAMDGC<sup>5</sup> datasets.

| Gene                 | SNP        | REF | ALT | Major/<br>Minor<br>allele | MAF<br>controls<br>CES | MAF<br>cases<br>CES | OR CES (95% CI)    | P-<br>value<br>CES | MAF<br>controls<br>EYE-RISK | MAF<br>cases<br>EYE-RISK | OR<br>EYE-<br>RISK | P-value<br>EYE-<br>RISK | MAF<br>controls<br>IAMDGC | MAF<br>cases<br>IAMDGC | OR IAMDGC<br>primary<br>analysis | P-value IAMDGC<br>primary analysis |
|----------------------|------------|-----|-----|---------------------------|------------------------|---------------------|--------------------|--------------------|-----------------------------|--------------------------|--------------------|-------------------------|---------------------------|------------------------|----------------------------------|------------------------------------|
| <i>ARMS2</i>         | rs10490924 | G   | T   | G/T                       | 0.142                  | 0.201               | 1.47 [1.12 - 1.93] | 0.005              | 0.181                       | 0.437                    | 3.29               | 9.04-55                 | 0.208                     | 0.436                  | 2.81                             | 0                                  |
| <i>ARMS2/HTRA1</i>   | rs3750846  | T   | C   | T/C                       | 0.140                  | 0.197               | 1.46 [1.11 - 1.92] | 0.007              | 0.181                       | 0.432                    | 3.18               | 5.26-52                 | 0.208                     | 0.436                  | 2.81                             | 6.5 <sup>-735</sup>                |
| <i>C2/CFB/SKIV2L</i> | rs429608   | G   | A   | G/A                       | 0.142                  | 0.078               | 0.51 [0.34 - 0.74] | 0.001              | 0.134                       | 0.087                    | 0.62               | 1.00-6                  | 0.148                     | 0.090                  | 0.57                             | 1.2 <sup>-103</sup>                |
| <i>C3</i>            | rs2230199  | G   | C   | G/C                       | 0.183                  | 0.168               | 0.91 [0.68 - 1.20] | 0.501              | 0.182                       | 0.249                    | 1.49               | 4.08-7                  | 0.208                     | 0.266                  | 1.43                             | 3.8 <sup>-69</sup>                 |
| <i>CFH</i>           | rs10922109 | C   | A   | C/A                       | 0.443                  | 0.361               | 0.72 [0.57 - 0.89] | 0.003              | 0.461                       | 0.243                    | 0.37               | 3.93-47                 | 0.426                     | 0.223                  | 0.38                             | 9.6 <sup>-618</sup>                |
| <i>CFH</i>           | rs570618   | G   | T   | G/T                       | 0.310                  | 0.340               | 1.11 [0.89 - 1.39] | 0.342              | 0.347                       | 0.578                    | 2.49               | 8.98-44                 | 0.364                     | 0.580                  | 2.38                             | 2.0 <sup>-590</sup>                |
