# Supplementary material for: Phenotypic Expression of CFH Rare Variants in Age-Related Macular Degeneration Patients in the Coimbra Eye Study
Source: PubMed Central journal article supplement — Invest Ophthalmol Vis Sci. 2022 Aug 4;63(9):5. doi: 10.1167/iovs.63.9.5 (PMC9363674; doi:10.1167/iovs.63.9.5), 2022-08-04
Supplement: iovs-63-9-5_s002.pdf [file iovs-63-9-5_s002.pdf]

Supplementary Table 2. Genotyped *CFH* rare variants in the CES population.

| Gene       | Position GRCh37 (hg19) | REF | ALT | Function            | ID               | Nucleotide Change | Protein change | SIFT | Polyphen 2_HDIV | CADD  | Variants (n) | MAC cases | MAC controls | maf cases | maf controls |
|------------|------------------------|-----|-----|---------------------|------------------|-------------------|----------------|------|-----------------|-------|--------------|-----------|--------------|-----------|--------------|
| <i>CFH</i> | 196621254              | C   | G   | nonsynonymous_SNV   | rs139254423      | C7G               | L3V            | T    | P               | 14.24 | 0            | 0         | 0            | 0.000     | 0.000        |
| <i>CFH</i> | 196642173              | T   | G   | nonsynonymous_SNV   | 1:196642173:T:G  | T124G             | Y42D           | D    | D               | 23.7  | 0            | 0         | 0            | 0.000     | 0.000        |
| <i>CFH</i> | 196642194              | A   | G   | nonsynonymous_SNV   | rs747546121      | A145G             | I49V           | T    | B               | 0.003 | 0            | 0         | 0            | 0.000     | 0.000        |
| <i>CFH</i> | 196642206              | C   | T   | nonsynonymous_SNV   | rs757785149      | C157T             | R53C           | D    | D               | 29.8  | 1            | 1         | 0            | 0.002     | 0.000        |
| <i>CFH</i> | 196642221              | T   | G   | nonsynonymous_SNV   | rs141336681      | T172G             | S58A           | T    | B               | 0.811 | 0            | 0         | 0            | 0.000     | 0.000        |
| <i>CFH</i> | 196642260              | T   | A   | nonsynonymous_SNV   | 1:196642260:T:A  | T211A             | W71R           | T    | D               | 24.2  | 0            | 0         | 0            | 0.000     | 0.000        |
| <i>CFH</i> | 196643064              | G   | A   | nonsynonymous_SNV   | rs868394050      | G322A             | V108I          | D    | B               | 23.6  | 0            | 0         | 0            | 0.000     | 0.000        |
| <i>CFH</i> | 196645133              | G   | A   | nonsynonymous_SNV   | 1:196645133:G:A  | G365A             | G122D          | D    | D               | 25.8  | 0            | 0         | 0            | 0.000     | 0.000        |
| <i>CFH</i> | 196645145              | A   | T   | nonsynonymous_SNV   | 1:196645145:A:T  | A377T             | Y126F          | T    | B               | 1.414 | 0            | 0         | 0            | 0.000     | 0.000        |
| <i>CFH</i> | 196645148              | G   | A   | nonsynonymous_SNV   | rs121913058      | G380A             | R127H          | D    | D               | 33.0  | 0            | 0         | 0            | 0.000     | 0.000        |
| <i>CFH</i> | 196645156              | G   | A   | nonsynonymous_SNV   | rs147002633      | G388A             | D130N          | T    | P               | 23.3  | 0            | 0         | 0            | 0.000     | 0.000        |
| <i>CFH</i> | 196645188              | A   | G   | nonsynonymous_SNV   | 1:196645188:A:G  | A420G             | I140M          | T    | P               | 23.3  | 0            | 0         | 0            | 0.000     | 0.000        |
| <i>CFH</i> | 196645195              | G   | A   | nonsynonymous_SNV   | 1:196645195:G:A  | G427A             | V143I          | T    | D               | 26.6  | 0            | 0         | 0            | 0.000     | 0.000        |
| <i>CFH</i> | 196646659              | G   | T   | nonsynonymous_SNV   | rs777300338      | G481T             | A161S          | T    | P               | 2.863 | 1            | 1         | 0            | 0.002     | 0.000        |
| <i>CFH</i> | 196646674              | C   | T   | nonsynonymous_SNV   | 1:196646674:C:T  | C496T             | R166W          | D    | D               | 25.2  | 0            | 0         | 0            | 0.000     | 0.000        |
| <i>CFH</i> | 196646682              | C   | A   | stopgain            | 1:196646682:C:A  | C504A             | Y168X          |      |                 | 24.1  | 0            | 0         | 0            | 0.000     | 0.000        |
| <i>CFH</i> | 196646684              | A   | G   | nonsynonymous_SNV   | rs768647508      | A506G             | H169R          | T    | B               | 0.001 | 0            | 0         | 0            | 0.000     | 0.000        |
| <i>CFH</i> | 196646701              | C   | T   | nonsynonymous_SNV   | 1:196646701:C:T  | C523T             | R175W          |      |                 |       | 0            | 0         | 0            | 0.000     | 0.000        |
| <i>CFH</i> | 196646702              | G   | A   | nonsynonymous_SNV   | 1:196646702:G:A  | G524A             | R175Q          | T    | B               | 0.015 | 0            | 0         | 0            | 0.000     | 0.000        |
| <i>CFH</i> | 196646727              | GA  | G   | frameshift_deletion | 1:196646727:GA:G | 550delA           | I184fs         |      |                 |       | 0            | 0         | 0            | 0.000     | 0.000        |
| <i>CFH</i> | 196646750              | A   | G   | nonsynonymous_SNV   | 1:196646750:A:G  | A572G             | H191R          | T    | D               | 18.63 | 0            | 0         | 0            | 0.000     | 0.000        |
| <i>CFH</i> | 196646755              | T   | C   | nonsynonymous_SNV   | 1:196646755:T:C  | T577C             | S193P          | D    | D               | 24.0  | 0            | 0         | 0            | 0.000     | 0.000        |
| <i>CFH</i> | 196646756              | C   | T   | nonsynonymous_SNV   | 1:196646756:C:T  | C578T             | S193L          | T    | D               | 23.4  | 0            | 0         | 0            | 0.000     | 0.000        |
| <i>CFH</i> | 196646760              | C   | A   | nonsynonymous_SNV   | 1:196646760:C:A  | C582A             | D194E          | T    | B               | 0.001 | 0            | 0         | 0            | 0.000     | 0.000        |
| <i>CFH</i> | 196648780              | T   | C   | nonsynonymous_SNV   | rs183474263      | T647C             | I216T          | T    | B               | 0.001 | 0            | 0         | 0            | 0.000     | 0.000        |
| <i>CFH</i> | 196648794              | A   | G   | nonsynonymous_SNV   | rs774239374      | A661G             | I221V          | T    | B               | 0.001 | 1            | 0         | 1            | 0.000     | 0.001        |
| <i>CFH</i> | 196648906              | C   | T   | nonsynonymous_SNV   | rs768526062      | C773T             | P258L          |      |                 | 21.1  | 17           | 13        | 4            | 0.033     | 0.004        |
| <i>CFH</i> | 196654203              | G   | A   | nonsynonymous_SNV   | 1:196654203:G:A  | G800A             | C267Y          | D    | D               | 23.8  | 0            | 0         | 0            | 0.000     | 0.000        |

|     |           |    |   |                     |                  |         |        |   |   |       |   |   |   |       |       |
|-----|-----------|----|---|---------------------|------------------|---------|--------|---|---|-------|---|---|---|-------|-------|
| CFH | 196654290 | A  | G | nonsynonymous_SNV   | 1:196654290:A:G  | A887G   | N296S  | T | P | 0.001 | 0 | 0 | 0 | 0.000 | 0.000 |
| CFH | 196654303 | TG | T | frameshift_deletion | 1:196654303:TG:T | 901delG | A301fs |   |   |       | 0 | 0 | 0 | 0.000 | 0.000 |
| CFH | 196654311 | G  | A | nonsynonymous_SNV   | rs766408580      | G908A   | R303Q  | T | B | 0.217 | 0 | 0 | 0 | 0.000 | 0.000 |
| CFH | 196654313 | G  | A | nonsynonymous_SNV   | 1:196654313:G:A  | G910A   | G304R  | D | D | 4.395 | 0 | 0 | 0 | 0.000 | 0.000 |
| CFH | 196654350 | C  | T | nonsynonymous_SNV   | 1:196654350:C:T  | C947T   | P316L  | D | D | 25.5  | 0 | 0 | 0 | 0.000 | 0.000 |
| CFH | 196658582 | G  | A | nonsynonymous_SNV   | 1:196658582:G:A  | G997A   | G333R  | D | D | 26.1  | 0 | 0 | 0 | 0.000 | 0.000 |
| CFH | 196658607 | G  | A | nonsynonymous_SNV   | rs371192606      | G1022A  | R341H  |   |   | 7.702 | 1 | 1 | 0 | 0.002 | 0.000 |
| CFH | 196658658 | A  | G | nonsynonymous_SNV   | rs576059537      | A1073G  | D358G  | T | D | 13.36 | 0 | 0 | 0 | 0.000 | 0.000 |
| CFH | 196658660 | G  | T | stopgain            | 1:196658660:G:T  | G1075T  | E359X  |   |   | 23    | 0 | 0 | 0 | 0.000 | 0.000 |
| CFH | 196658733 | T  | C | nonsynonymous_SNV   | rs762389370      | T1148C  | V383A  | T | P | 0.006 | 1 | 0 | 1 | 0.000 | 0.001 |
| CFH | 196658738 | T  | C | nonsynonymous_SNV   | 1:196658738:T:C  | T1153C  | C385R  | D | D | 23.9  | 0 | 0 | 0 | 0.000 | 0.000 |
| CFH | 196659231 | C  | A | nonsynonymous_SNV   | rs201671665      | C1198A  | Q400K  | T | B | 0.001 | 0 | 0 | 0 | 0.000 | 0.000 |
| CFH | 196659255 | C  | T | stopgain            | rs121913061      | C1222T  | Q408X  |   |   | 32    | 0 | 0 | 0 | 0.000 | 0.000 |
| CFH | 196659309 | C  | T | stopgain            | 1:196659309:C:T  | C1276T  | Q426X  |   |   | 34    | 0 | 0 | 0 | 0.000 | 0.000 |
| CFH | 196682946 | C  | T | nonsynonymous_SNV   | rs371053403      | C1418T  | A473V  | T | B | 8.370 | 0 | 0 | 0 | 0.000 | 0.000 |
| CFH | 196683035 | C  | G | nonsynonymous_SNV   | rs570523689      | C1507G  | P503A  | T | D | 22.7  | 0 | 0 | 0 | 0.000 | 0.000 |
| CFH | 196684751 | T  | A | nonsynonymous_SNV   | rs147403664      | T1548A  | N516K  | T | D | 16.62 | 1 | 1 | 0 | 0.002 | 0.000 |
| CFH | 196684798 | T  | C | nonsynonymous_SNV   | rs201193547      | T1595C  | L532S  | D | D | 24.5  | 0 | 0 | 0 | 0.000 | 0.000 |
| CFH | 196684807 | A  | G | nonsynonymous_SNV   | 1:196684807:A:G  | A1604G  | E535G  | D | D | 24.5  | 0 | 0 | 0 | 0.000 | 0.000 |
| CFH | 196684814 | T  | A | nonsynonymous_SNV   | 1:196684814:T:A  | T1611A  | H537Q  | T | B | 0.009 | 0 | 0 | 0 | 0.000 | 0.000 |
| CFH | 196684825 | A  | G | nonsynonymous_SNV   | 1:196684825:A:G  | A1622G  | E541G  | T | D | 21.3  | 1 | 1 | 0 | 0.002 | 0.000 |
| CFH | 196694253 | A  | G | nonsynonymous_SNV   | rs757756991      | A1699G  | R567G  | T | D | 23    | 0 | 0 | 0 | 0.000 | 0.000 |
| CFH | 196694262 | G  | A | nonsynonymous_SNV   | rs76405615       | G1708A  | E570K  |   | B | 0.235 | 0 | 0 | 0 | 0.000 | 0.000 |
| CFH | 196694332 | T  | A | stopgain            | 1:196694332:T:A  | T1778A  | L593X  |   |   | 36    | 0 | 0 | 0 | 0.000 | 0.000 |
| CFH | 196694418 | A  | G | nonsynonymous_SNV   | 1:196694418:A:G  | A1864G  | I622V  | T | B | 0.194 | 2 | 1 | 1 | 0.002 | 0.001 |
| CFH | 196695609 | A  | G | nonsynonymous_SNV   | 1:196695609:A:G  | A1883G  | Q628R  | T | B | 0.001 | 0 | 0 | 0 | 0.000 | 0.000 |
| CFH | 196695648 | T  | C | nonsynonymous_SNV   | rs371768180      | T1922C  | V641A  | T | B | 0.258 | 0 | 0 | 0 | 0.000 | 0.000 |
| CFH | 196695675 | G  | T | nonsynonymous_SNV   | rs143237092      | G1949T  | G650V  | T | B | 0.034 | 0 | 0 | 0 | 0.000 | 0.000 |
| CFH | 196695721 | G  | A | nonsynonymous_SNV   | 1:196695721:G:A  | G1995A  | M665I  | D | B | 23.3  | 0 | 0 | 0 | 0.000 | 0.000 |
| CFH | 196695756 | A  | G | nonsynonymous_SNV   | 1:196695756:A:G  | A2030G  | E677G  | T | B | 0.849 | 0 | 0 | 0 | 0.000 | 0.000 |
| CFH | 196695927 | A  | C | nonsynonymous_SNV   | 1:196695927:A:C  | A2093C  | E698A  | T | B | 7.448 | 0 | 0 | 0 | 0.000 | 0.000 |
| CFH | 196695975 | C  | G | stopgain            | 1:196695975:C:G  | C2141G  | S714X  |   |   | 35    | 0 | 0 | 0 | 0.000 | 0.000 |
| CFH | 196695985 | C  | A | nonsynonymous_SNV   | rs763441589      | C2151A  | F717L  | D | B | 12.93 | 1 | 1 | 0 | 0.002 | 0.000 |

|     |           |   |   |                   |                 |        |        |   |   |       |    |   |    |       |       |
|-----|-----------|---|---|-------------------|-----------------|--------|--------|---|---|-------|----|---|----|-------|-------|
| CFH | 196696029 | C | T | nonsynonymous_SNV | rs201360629     | C2195T | T732M  | T | B | 11.39 | 0  | 0 | 0  | 0.000 | 0.000 |
| CFH | 196697494 | A | G | nonsynonymous_SNV | 1:196697494:A:G | A2255G | K752R  | T | B | 8.420 | 0  | 0 | 0  | 0.000 | 0.000 |
| CFH | 196697498 | C | A | stopgain          | 1:196697498:C:A | C2259A | C753X  |   |   | 36    | 0  | 0 | 0  | 0.000 | 0.000 |
| CFH | 196697519 | A | G | nonsynonymous_SNV | 1:196697519:A:G | A2280G | I760M  | T | B | 0.131 | 0  | 0 | 0  | 0.000 | 0.000 |
| CFH | 196697552 | C | A | nonsynonymous_SNV | 1:196697552:C:A | C2313A | F771L  | D | B | 13.01 | 0  | 0 | 0  | 0.000 | 0.000 |
| CFH | 196697568 | A | G | nonsynonymous_SNV | rs761904009     | A2329G | I777V  | T | B | 0.001 | 0  | 0 | 0  | 0.000 | 0.000 |
| CFH | 196705989 | A | T | nonsynonymous_SNV | 1:196705989:A:T | A2449T | I817F  | D | P | 25.7  | 0  | 0 | 0  | 0.000 | 0.000 |
| CFH | 196706001 | C | T | nonsynonymous_SNV | rs367687415     | C2461T | H821Y  | T | B | 0.001 | 0  | 0 | 0  | 0.000 | 0.000 |
| CFH | 196706028 | C | T | nonsynonymous_SNV | rs62641696      | C2488T | R830W  |   | P | 22.2  | 0  | 0 | 0  | 0.000 | 0.000 |
| CFH | 196706112 | T | A | nonsynonymous_SNV | 1:196706112:T:A | T2572A | W858R  | D | D | 25.5  | 0  | 0 | 0  | 0.000 | 0.000 |
| CFH | 196706633 | G | C | nonsynonymous_SNV | 1:196706633:G:C | G2625C | Q875H  | T | B | 0.001 | 0  | 0 | 0  | 0.000 | 0.000 |
| CFH | 196706659 | C | A | nonsynonymous_SNV | rs114743644     | C2651A | S884Y  | T | P | 10.94 | 1  | 0 | 1  | 0.000 | 0.001 |
| CFH | 196706677 | G | T | nonsynonymous_SNV | rs515299        | G2669T | S890I  | T | B | 0.463 | 25 | 9 | 16 | 0.021 | 0.014 |
| CFH | 196709816 | G | T | nonsynonymous_SNV | rs149474608     | G2850T | Q950H  | D | P | 21.4  | 0  | 0 | 0  | 0.000 | 0.000 |
| CFH | 196709833 | C | T | nonsynonymous_SNV | rs145975787     | C2867T | T956M  | T | D | 15.09 | 0  | 0 | 0  | 0.000 | 0.000 |
| CFH | 196709874 | A | G | nonsynonymous_SNV | rs759625279     | A2908G | I970V  | T | B | 0.01  | 0  | 0 | 0  | 0.000 | 0.000 |
| CFH | 196709875 | T | C | nonsynonymous_SNV | 1:196709875:T:C | T2909C | I970T  | T | B | 0.004 | 0  | 0 | 0  | 0.000 | 0.000 |
| CFH | 196711052 | G | C | nonsynonymous_SNV | rs201816520     | G3004C | G1002R | T | D | 7.236 | 1  | 1 | 0  | 0.002 | 0.000 |
| CFH | 196711098 | C | T | nonsynonymous_SNV | rs34362004      | C3050T | T1017I | D | P | 12.48 | 0  | 0 | 0  | 0.000 | 0.000 |
| CFH | 196711125 | G | A | nonsynonymous_SNV | 1:196711125:G:A | G3077A | G1026E | D | D | 24.7  | 0  | 0 | 0  | 0.000 | 0.000 |
| CFH | 196712596 | A | T | nonsynonymous_SNV | rs35274867      | A3148T | N1050Y | T | B | 3.424 | 32 | 3 | 29 | 0.007 | 0.025 |
| CFH | 196712624 | T | C | nonsynonymous_SNV | rs35343172      | T3176C | I1059T | D | B | 12.25 | 0  | 0 | 0  | 0.000 | 0.000 |
| CFH | 196712674 | C | G | nonsynonymous_SNV | rs62625015      | C3226G | Q1076E | T | B | 0.003 | 0  | 0 | 0  | 0.000 | 0.000 |
| CFH | 196712682 | G | T | nonsynonymous_SNV | rs121913062     | G3234T | R1078S | T | B | 0.637 | 0  | 0 | 0  | 0.000 | 0.000 |
| CFH | 196716253 | T | C | nonsynonymous_SNV | 1:196716253:T:C | T3506C | I1169T | D | B | 23.8  | 0  | 0 | 0  | 0.000 | 0.000 |
| CFH | 196716261 | G | T | stopgain          | rs121913060     | G3514T | E1172X |   |   | 39    | 0  | 0 | 0  | 0.000 | 0.000 |
| CFH | 196716375 | C | T | nonsynonymous_SNV | rs121913059     | C3628T | R1210C | T | B | 11.77 | 0  | 0 | 0  | 0.000 | 0.000 |
| CFH | 196716399 | T | G | nonsynonymous_SNV | 1:196716399:T:G | T3652G | C1218G | D | D | 23.5  | 0  | 0 | 0  | 0.000 | 0.000 |
| CFH | 196716415 | T | A | nonsynonymous_SNV | 1:196716415:T:A | T3668A | L1223Q | D | D | 24.1  | 1  | 0 | 1  | 0.000 | 0.001 |

D Probably damaging/ deleterious; P Possible damaging; B Benign; T Tolerated.
